# Supplementary material for: Effect Modification by Environmental Quality on the Association between Heatwaves and Mortality in Alabama, United States
Source: MDPI journal article supplement (doi:10.3390/ijerph14101143), 2017-09-28
Supplement: s1 [file s1]

**Table S1.** Coefficients for the Interaction term (mean and (95% CI)) comparing the associations between heatwave indices (HIs) and non-accidental death (NAD) in EQI tertile 2 and 3 to EQI tertile 1.

| EQI Tertiles       | Difference in Coefficients (95% CI) |                     |                     |
|--------------------|-------------------------------------|---------------------|---------------------|
|                    | HI 01                               | HI 02               | HI 07               |
| Overall 2          | 0.03 (−0.20, 0.26)                  | 0.06 (−0.05, 0.18)  | 0.15 (−0.04, 0.35)  |
| Overall 3          | 0.23 (0.02, 0.45)                   | 0.14 (0.03, 0.25)   | 0.32 (0.13, 0.51)   |
| Air 2              | 0.07 (−0.16, 0.31)                  | 0.11 (−0.01, 0.23)  | 0.13 (−0.07, 0.34)  |
| Air 3              | 0.24 (0.03, 0.45)                   | 0.13 (0.03, 0.24)   | 0.30 (0.11, 0.48)   |
| Water 2            | −0.20 (−0.40, 0.01)                 | −0.08 (−0.19, 0.02) | −0.07 (−0.25, 0.12) |
| Water 3            | −0.10 (−0.27, 0.08)                 | −0.04 (−0.13, 0.05) | 0.06 (−0.10, 0.22)  |
| Land 2             | 0.09 (−0.09, 0.26)                  | 0.05 (−0.04, 0.14)  | 0.07 (−0.08, 0.22)  |
| Land 3             | 0.11 (−0.03, 0.26)                  | 0.05 (−0.03, 0.13)  | 0.10 (−0.03, 0.23)  |
| Built 2            | 0.01 (−0.23, 0.24)                  | 0.04 (−0.08, 0.16)  | 0.04 (−0.17, 0.25)  |
| Built 3            | 0.17 (−0.06, 0.39)                  | 0.09 (−0.02, 0.21)  | 0.15 (−0.05, 0.34)  |
| Sociodemographic 2 | 0.10 (−0.04, 0.24)                  | 0.03 (−0.04, 0.10)  | −0.01 (−0.14, 0.12) |
| Sociodemographic 3 | 0.02 (−0.17, 0.21)                  | 0.03 (−0.07, 0.13)  | −0.01 (−0.17, 0.15) |

EQI: Environmental Quality Index.

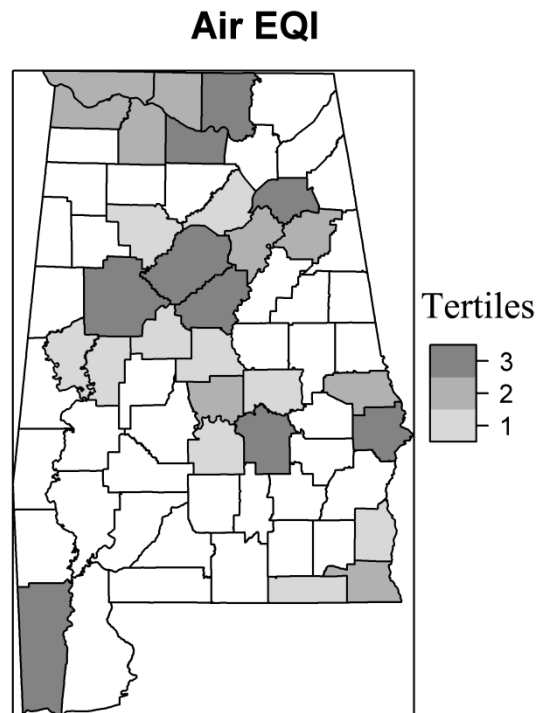

**Figure S1.** Tertiles for air EQI in metropolitan counties in Alabama. Non-metropolitan counties are white. Tertile 1: counties with the best air qualities in metropolitan areas; tertile 2: counties with median level air qualities; tertile 3: counties with the worst air qualities.

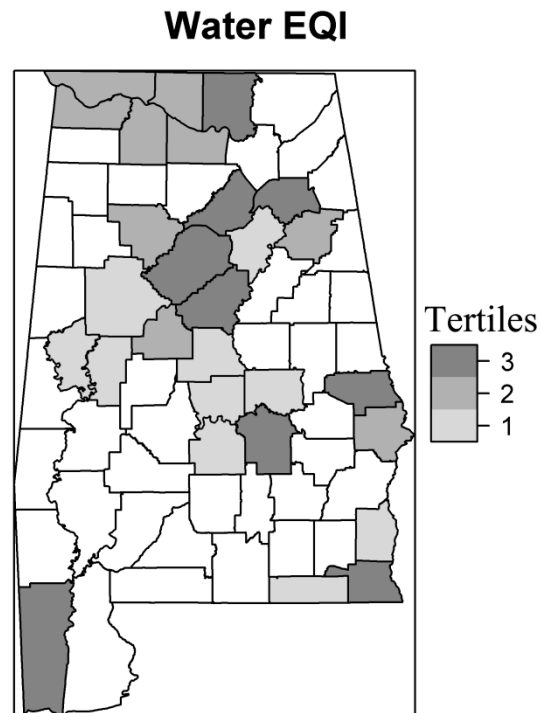

**Figure S2.** Tertiles for water EQI in metropolitan counties in Alabama. Non-metropolitan counties are white. Tertile 1: counties with the best water qualities in metropolitan areas; tertile 2: counties with median level water qualities; tertile 3: counties with the worst water qualities.

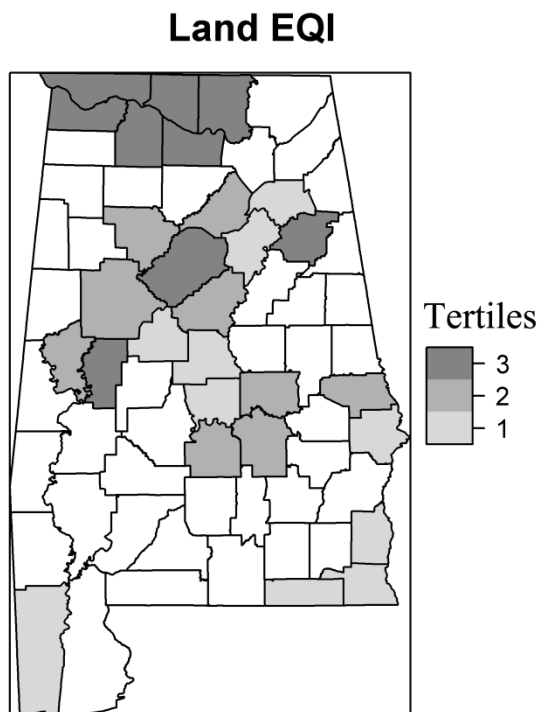

**Figure S3.** Tertiles for land EQI in metropolitan counties in Alabama. Non-metropolitan counties are white. Tertile 1: counties with the best land environments in metropolitan areas; tertile 2: counties with median level land environments; tertile 3: counties with the worst land environments.

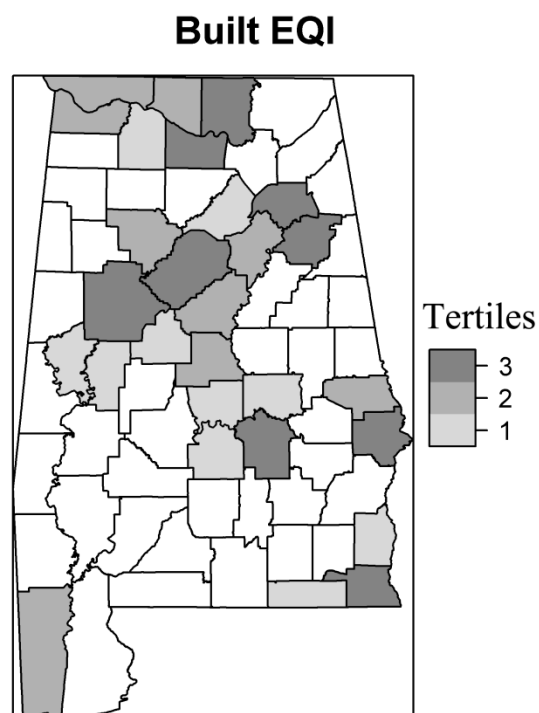

**Figure S4.** Tertiles for built EQI in metropolitan counties in Alabama. Non-metropolitan counties are white. Tertile 1: counties with the best built environments in metropolitan areas; tertile 2: counties with median level built land environments; tertile 3: counties with the worst built environments.

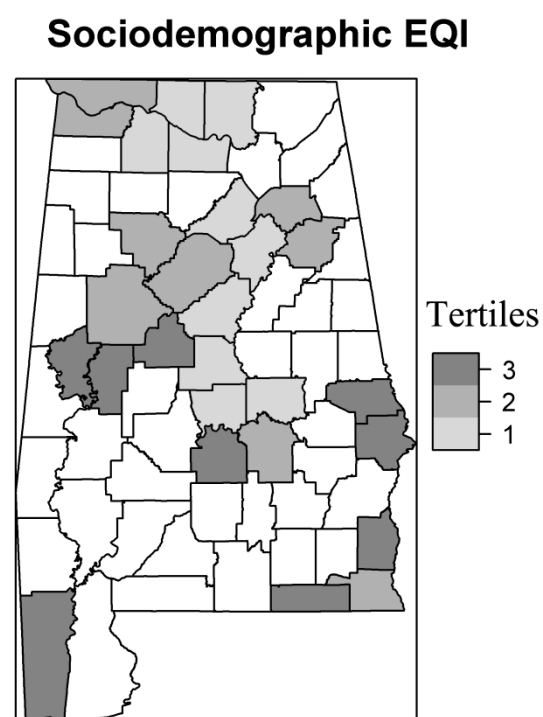

**Figure S5.** Tertiles for sociodemographic EQI in metropolitan counties in Alabama. Non-metropolitan counties are white. Tertile 1: counties with the best sociodemographic environments in metropolitan areas; tertile 2: counties with median level sociodemographic environments; tertile 3: counties with the worst sociodemographic environments.
